# Supplementary material
Source: HighWire-hosted journal article supplement (https://erj.ersjournals.com/content/54/6/1901950)
Supplement: inline-supplementary-material-1 [file inline-supplementary-material-1.pdf]

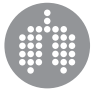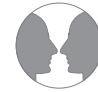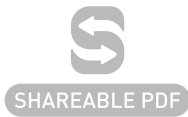

# Acute hypoxaemic respiratory failure in immunocompromised patients: abandon bronchoscopy or make it better?

Matt S. Zinter <sup>1</sup> and Guang-Shing Cheng<sup>2,3</sup>

**Affiliations:** <sup>1</sup>University of California, San Francisco, School of Medicine, Dept of Pediatrics, Division of Critical Care Medicine, San Francisco, CA, USA. <sup>2</sup>University of Washington School of Medicine, Dept of Medicine, Division of Pulmonary, Critical Care and Sleep Medicine, Seattle, WA, USA. <sup>3</sup>Fred Hutchinson Cancer Research Center, Clinical Research Division, Seattle, WA, USA.

**Correspondence:** Matt S. Zinter, University of California, San Francisco; School of Medicine, Dept of Pediatrics, Division of Pediatric Critical Care Medicine; 550 16th Street, San Francisco, CA 94143, USA. E-mail: matt.zinter@ucsf.edu

 @ERSpublications

**A discussion of the strengths and limitations of recent data associating bronchoscopy with mortality in immunocompromised adults with acute hypoxaemic respiratory failure** <http://bit.ly/31mMpGL>

**Cite this article as:** Zinter MS, Cheng G-S. Acute hypoxaemic respiratory failure in immunocompromised patients: abandon bronchoscopy or make it better?. *Eur Respir J* 2019; 54: 1901950 [<https://doi.org/10.1183/13993003.01950-2019>].

This single-page version can be shared freely online.

*To the Editor:*

Acute hypoxemic respiratory failure (AHRF) in immunocompromised patients is a challenging clinical problem associated with mortality rates of 40–60% in children and adults [1, 2]. Thus, we read with great interest the results of a pre-planned secondary analysis of a large multicentre observational cohort of 1611 immunocompromised adults with AHRF, as reported by BAUER *et al.* [3]. The authors described the diagnostic yield and outcomes of fiberoptic bronchoscopy (FOB) in this group of vulnerable patients with the *a priori* hypothesis that “bronchoscopy, with limited complications, would reduce the number of unidentified causes of respiratory failure and be associated with reduced hospital mortality.” After a rigorous analysis of a highly annotated dataset, the authors conclude that “bronchoscopy was associated with improved diagnosis and changes in management but also increased hospital mortality.”
